# Supplementary material
Source: Elsevier journal article supplement (https://www.sciencedirect.com/science/article/pii/S2529993X22000788)
Supplement: mmc1 [file S2529993X22000788:mmc1.docx]

| Fecha | Al ingreso | Al ingreso en UCI | Al alta |
| --- | --- | --- | --- |
| Proteína C reactiva (mg/dL) | 17,04 | 36,9 | 0,3 |
| Procalcitonina(ng/mL) | 0,3 | 3,77 | 0,03 |
| Ferritina(µg/L) | 352 | 622,4 | 342,7 |
| Triglicéridos(mg/dL) |  | 120 |  |
| Receptor soluble Interleucina-2(U/mL) |  | 3819 |  |
| Creatinina(mg/dL) | 0,71 | 0,41 | 0,59 |
| GPT (UI/L) | 49 | 21 | 66 |
| GGT (UI/L) | 64 | 71 | 212 |
| NT-proBNP(pg/mL) |  | 21100 | 838 |
| Troponina I(ng/L) |  | 8 | 27 |
| LDH (UI/L) | 163 | 138 | 191 |
| Hemoglobina (g/dL) | 11,8 | 9,8 | 10,4 |
| Neutrófilos(celx109/L) | 2,31 | 11,32 | 1,38 |
| Linfocitos(celx109/L) | 0,25 | 0,48 | 1,76 |
| Plaquetas(celx109/L) | 103,4 | 160,5 | 165,5 |
| Quick(%) | 93,4 | 60,2 | 92 |
| Dímero-D(mg/L) | 3,3 |  | 2,76 |
| Fibrinógeno(mg/dL) | 485 | 433 | 189 |
| Velocidad de sedimentación globular (mm/1ªh) | 124 |  | 35 |

**Tabla 1 Supl.** Valores analíticos al ingreso, ingreso en unidad de cuidados intensivos (UCI) y al alta
